# Supplementary material for: Impact of high CO2 on the geochemistry of the coralline algae Lithothamnion glaciale
Source: PubMed Central journal article supplement (PMC4744931; doi:10.1038/srep20572), 2016-02-08
Supplement: srep20572-s1.pdf [file srep20572-s1.pdf]

## Supplementary Information for

### Impact of high CO<sub>2</sub> on the geochemistry of the coralline algae *Lithothamnion glaciale*

Ragazzola, F.<sup>1,5,\*</sup>, Foster, L.C.<sup>1</sup>, Jones, C.J.<sup>2</sup>, Scott, T.B.<sup>2</sup>, Fietzke J<sup>3</sup>, Matt R Kilburn<sup>4</sup>,  
Schmidt, D.N.<sup>1</sup>

<sup>1</sup> School of Earth Sciences, University of Bristol, Wills Memorial Building, Bristol BS8 1RJ, UK

<sup>2</sup> Interface Analysis Centre, School of Physics, Tyndall Avenue, Bristol BS8 1TL, UK

<sup>3</sup> GEOMAR | Helmholtz Centre for Ocean Research Kiel, Wischhofstraße 1-3, 24148 Kiel, Germany

<sup>4</sup> Centre for Microscopy, Characterisation and Analysis, University of Western Australia, Australia

<sup>5</sup> Current address: Institute of Marine Sciences, University of Portsmouth, Ferry Road, Portsmouth PO4 9LY

\* Corresponding author

### Seawater chemistry

#### Carbonate system

| treatment                 | pH<br>(free scale) | Sal          | T<br>(°C)   | TAlk<br>( $\mu\text{mol kg}^{-1}$ ) | DIC<br>( $\mu\text{mol kg}^{-1}$ ) | HCO <sub>3</sub> <sup>-</sup><br>( $\mu\text{mol kg}^{-1}$ ) | $\Omega_{\text{Ca}}$ | $\Omega_{\text{Ar}}$ | pCO <sub>2</sub><br>( $\mu\text{atm}$ ) |
|---------------------------|--------------------|--------------|-------------|-------------------------------------|------------------------------------|--------------------------------------------------------------|----------------------|----------------------|-----------------------------------------|
| 1 (410 $\mu\text{atm}$ )  | 8.03±<br>0.05      | 32.2±<br>1.2 | 7.7±<br>0.2 | 2311.5±<br>101.2                    | 2159.45±<br>86.6                   | 2076.7±<br>76.6                                              | 2.8±<br>0.33         | 1.77±<br>0.2         | 422±<br>38.9                            |
| 2 (560 $\mu\text{atm}$ )  | 7.90±<br>0.03      | 31.3±<br>0.1 | 7.6±<br>0.1 | 2315.0±<br>122.7                    | 2216.7±<br>89.2                    | 2181.8±<br>106.4                                             | 2.08±<br>0.3         | 1.31±<br>0.2         | 589±<br>29.6                            |
| 4 (840 $\mu\text{atm}$ )  | 7.81±<br>0.07      | 31.5±<br>0.7 | 7.7±<br>0.3 | 2355.1±<br>96.0                     | 2496.1±<br>0.1                     | 2226.5±<br>77.8                                              | 1.78±<br>0.34        | 1.12±<br>0.2         | 755±<br>118.10                          |
| 3 (1120 $\mu\text{atm}$ ) | 7.72±<br>0.07      | 31.6±<br>0.7 | 7.7±<br>0.2 | 2537.7±<br>97.5                     | 2285.37±<br>155.9                  | 2403.8±<br>83.9                                              | 1.55±<br>0.15        | 0.98±<br>0.09        | 1018±<br>174.8                          |

Carbonate system parameters during the 3 months incubation of *L. glaciale*. All numbers are mean values (n=4) ± STD. The pH, salinity, temperature and total alkalinity (TAlk) were measured while other parameters were calculated (from Ragazzola et al 2012).

## **Experimental set up**

Specimens of *L. glaciale* Kjellman were collected in Kattegat (57° 0.84' N, 11° 35.10' E and 57° 0.38' N, 11° 34.88' E) at 20 meters depth in June 2010 on board RC Littorina. The selected specimens were randomly assigned in 16, 5L glass aquaria filled up with natural seawater (salinity 32) and bubbled with 4 different CO<sub>2</sub> concentrations (422 µatm, 589 µatm, 755 µatm and 1018 µatm) for 3 months using a CO<sub>2</sub> mixing-facility (KICO2 - Kiel CO<sub>2</sub> manipulation experimental facility, Linde Gas & HTK Hamburg, Germany). The pCO<sub>2</sub> concentration were slowly increased over 1 month, apart from the control, until the desired concentrations were reached. The experimental condition were set at 7 ± 0.5 °C with 20 µmol photons m<sup>-2</sup> sec<sup>-1</sup> in 12 hours light/ dark cycle. For this study only the *L.glaciale* cultured at 589 µatm and the control were used (from Ragazzola et al. 2012).

## NanoSIMS elemental ratio

### individual ROI results

| sample              | ROI            | Mg/Ca     | 2SE       | 2SEM | Sr/Ca     | 2SE       | 2SEM |
|---------------------|----------------|-----------|-----------|------|-----------|-----------|------|
|                     |                | [mol/mol] | [mol/mol] | [%]  | [mol/mol] | [mol/mol] | [%]  |
| Hi CO2<br>Image 17  | 1 Interstitial | 0.0262    | 0.0002    | 0.6  | 0.00237   | 0.00003   | 1.3  |
|                     | 2 Interstitial | 0.0279    | 0.0002    | 0.7  | 0.00223   | 0.00004   | 2.0  |
|                     | 3 Interstitial | 0.0274    | 0.0002    | 0.8  | 0.00228   | 0.00005   | 2.3  |
|                     | 4 HighMg       | 0.0446    | 0.0004    | 1.0  | 0.00298   | 0.00007   | 2.2  |
|                     | 5 HighMg       | 0.0513    | 0.0002    | 0.4  | 0.00307   | 0.00003   | 1.1  |
|                     | 6 HighMg       | 0.0558    | 0.0011    | 2.0  | 0.00320   | 0.00010   | 3.1  |
|                     | 7 HighMg       | 0.0449    | 0.0007    | 1.5  | 0.00321   | 0.00015   | 4.5  |
|                     | highest        | 0.0614    |           |      | 0.00411   |           |      |
| Summer<br>Image 28  | 1 Interstitial | 0.0305    | 0.0003    | 0.9  | 0.00223   | 0.00004   | 2.0  |
|                     | 2 Interstitial | 0.0339    | 0.0003    | 1.0  | 0.00231   | 0.00007   | 3.0  |
|                     | 3 Interstitial | 0.0330    | 0.0009    | 2.6  | 0.00232   | 0.00013   | 5.5  |
|                     | 4 HighMg       | 0.0912    | 0.0015    | 1.6  | 0.00409   | 0.00014   | 3.5  |
|                     | 5 HighMg       | 0.0887    | 0.0023    | 2.6  | 0.00419   | 0.00027   | 6.3  |
|                     | 6 HighMg       | 0.0891    | 0.0016    | 1.8  | 0.00392   | 0.00016   | 4.2  |
|                     | 7 HighMg       | 0.0971    | 0.0015    | 1.6  | 0.00428   | 0.00016   | 3.7  |
|                     | highest        | 0.1227    |           |      | 0.00505   |           |      |
| Winter<br>Image 40  | 1 Interstitial | 0.0261    | 0.0002    | 0.8  | 0.00253   | 0.00004   | 1.6  |
|                     | 2 Interstitial | 0.0226    | 0.0003    | 1.2  | 0.00244   | 0.00006   | 2.4  |
|                     | 3 Interstitial | 0.0275    | 0.0006    | 2.1  | 0.00256   | 0.00013   | 5.1  |
|                     | 4 HighMg       | 0.0443    | 0.0004    | 0.9  | 0.00292   | 0.00007   | 2.3  |
|                     | 5 HighMg       | 0.0496    | 0.0010    | 2.1  | 0.00297   | 0.00007   | 2.3  |
|                     | 6 HighMg       | 0.0390    | 0.0009    | 2.4  | 0.00258   | 0.00009   | 3.4  |
|                     | 7 HighMg       | 0.0392    | 0.0006    | 1.5  | 0.00258   | 0.00007   | 2.7  |
|                     | highest        | 0.0552    |           |      | 0.00493   |           |      |
| Control<br>Image 42 | 1 Interstitial | 0.0304    | 0.0002    | 0.6  | 0.00262   | 0.00003   | 1.2  |
|                     | 2 Interstitial | 0.0295    | 0.0005    | 1.8  | 0.00256   | 0.00012   | 4.8  |
|                     | 3 Interstitial | 0.0314    | 0.0016    | 5.1  | 0.00265   | 0.00035   | 13.2 |
|                     | 4 HighMg       | 0.0555    | 0.0006    | 1.1  | 0.00273   | 0.00004   | 1.5  |
|                     | 5 HighMg       | 0.0509    | 0.0005    | 0.9  | 0.00268   | 0.00004   | 1.5  |
|                     | 6 HighMg       | 0.0517    | 0.0006    | 1.2  | 0.00253   | 0.00006   | 2.2  |
|                     | 7 HighMg       | 0.0732    | 0.0011    | 1.6  | 0.00375   | 0.00009   | 2.5  |
|                     | highest        | 0.1092    |           |      | 0.00610   |           |      |

Table SI A: individual ROI results

### means of ROI

| sample              | ROI  | Mg/Ca        | SD        | RSD       | Sr/Ca     | SD        | RSD     |      |
|---------------------|------|--------------|-----------|-----------|-----------|-----------|---------|------|
|                     |      | [mol/mol]    | [mol/mol] | [mol/mol] | [mol/mol] | [mol/mol] | [%]     |      |
| Hi CO2<br>Image 17  | mean | interstitial | 0.0272    | 0.0009    | 3.2       | 0.00229   | 0.00007 | 3.0  |
|                     | mean | high         | 0.0492    | 0.0054    | 10.9      | 0.00312   | 0.00011 | 3.4  |
| Summer<br>Image 28  | mean | interstitial | 0.0325    | 0.0018    | 5.6       | 0.00229   | 0.00005 | 2.1  |
|                     | mean | high         | 0.0915    | 0.0039    | 4.2       | 0.00412   | 0.00015 | 3.8  |
| Winter<br>Image 40  | mean | interstitial | 0.0254    | 0.0025    | 9.7       | 0.00251   | 0.00006 | 2.5  |
|                     | mean | high         | 0.0430    | 0.0050    | 11.7      | 0.00276   | 0.00021 | 7.7  |
| Control<br>Image 42 | mean | interstitial | 0.0304    | 0.0009    | 3.1       | 0.00261   | 0.00005 | 1.8  |
|                     | mean | high         | 0.0578    | 0.0105    | 18.1      | 0.00292   | 0.00056 | 19.1 |

Table SI B: means of ROI

Table S1: Elemental ratios extracted from regions-of-interest (ROI) within NanoSIMS images. Uncertainties of individual ROI data (part A) are given as 2SE and related to the analytical uncertainty within each ROI. Uncertainties of the means of ROI (part B) are reported as SD representing the variability within the sample.

### XRD of *Lithothamion glaciale*

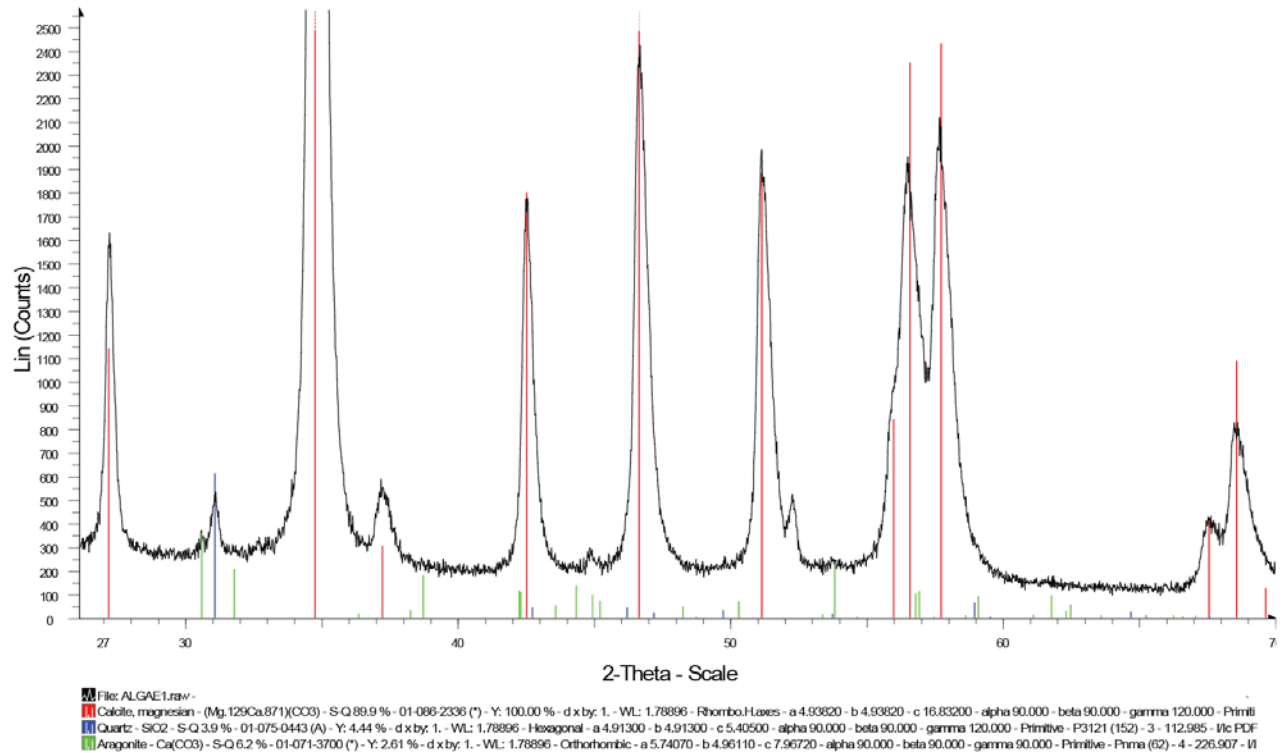

Fig S1: XRD spectrum, showing no sign of dolomite. This is important since in the tropical coralline algae *Porolithon onkodes* the presence of dolomite in the skeleton lowers the dissolution rates by 6-10 times (Nash *et al.*, 2012).

## NanoSIMS Mg/Ca and Sr/Ca ratios

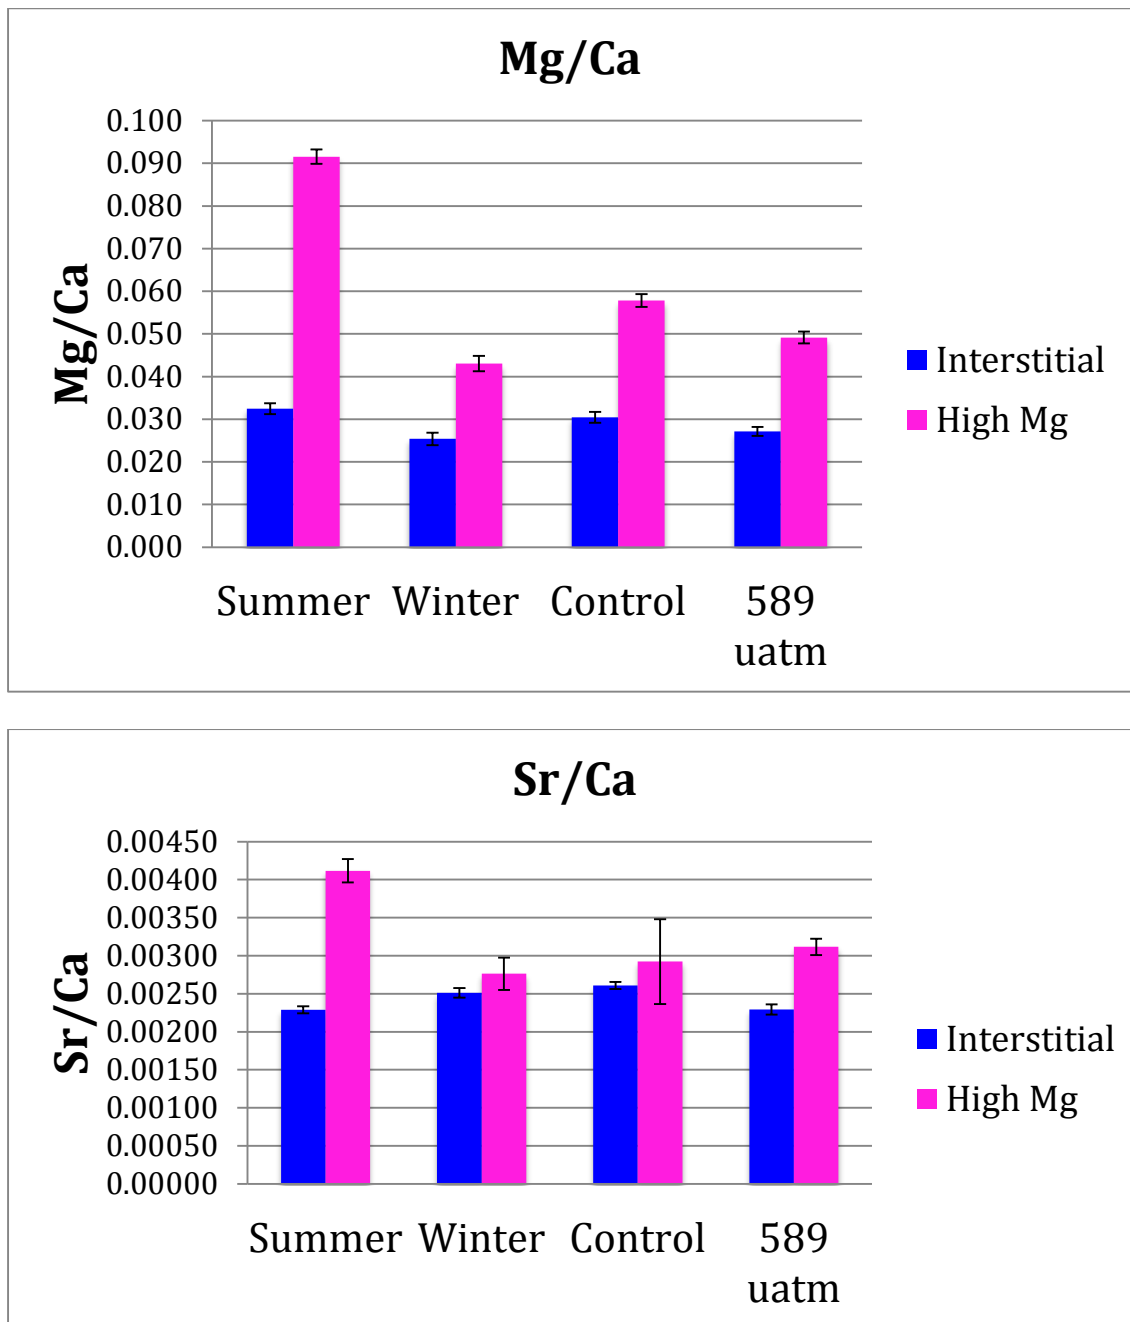

Fig S2: Mg/Ca and Sr/Ca ratios measured by NanoSIMS. The ratios were determined by extracting deadtime-corrected counts from regions-of-interest (ROI) in the ion images, and processing in a spreadsheet. Errors are expressed as the standard deviation

of the pixels within the ROIs. “High Mg” refers to the highest measured ratios within a given image pair.
